# Supplementary material
Source: publisher figshare collection journal article supplement (https://acs.figshare.com/ndownloader/files/13277153)
Supplement: Supplementary file 1 [file 13277153]

# Supplementary information for

## Photodegradation Activity of Sputtered Indium Oxide and Sub-oxide Thin Films on Rhodamine-B Dye

Joel YY Loh<sup>†</sup>, Nazir P. Kherani<sup>†,‡,\*</sup>

<sup>†</sup> Department of Electrical and Computing Engineering, University of Toronto, 10 King's College Road, Toronto, ON M5S 3G4, Canada

<sup>‡</sup> Department of Materials Science and Engineering, University of Toronto, 140 College Street, Toronto, ON M5S 3E4, Canada

|                                  | Unit cell              | Sub-oxide I             | Sub-oxide II            |
|----------------------------------|------------------------|-------------------------|-------------------------|
| Cavity 1 Volume                  | 32.01 Å <sup>3</sup>   | 65.1728 Å <sup>3</sup>  | 34.2260 Å <sup>3</sup>  |
| Cavity 1 Surface Area            | 61.7038 Å <sup>2</sup> | 90.1148 Å <sup>2</sup>  | 64.1029 Å <sup>2</sup>  |
| Cavity 1 squared gyration radius | 2.6053 Å <sup>2</sup>  | 3.9553 Å <sup>2</sup>   | 2.6322 Å <sup>2</sup>   |
| Cavity 2 Volume                  | 27.9772 Å <sup>3</sup> | 30.6001 Å <sup>3</sup>  | 37.8965 Å <sup>3</sup>  |
| Cavity 2 Surface Area            | 54.4932 Å <sup>2</sup> | 55.0001 Å <sup>2</sup>  | 67.7500 Å <sup>2</sup>  |
| Cavity 2 squared gyration radius | 2.3265 Å <sup>2</sup>  | 2.3717 Å <sup>2</sup>   | 2.8914 Å <sup>2</sup>   |
| Cavity 3 Volume                  |                        | 62.7446 Å <sup>3</sup>  | 37.0417 Å <sup>3</sup>  |
| Cavity 3 Surface Area            |                        | 114.1808 Å <sup>2</sup> | 63.8927 Å <sup>2</sup>  |
| Cavity 3 squared gyration radius |                        | 8.5463 Å <sup>2</sup>   | 2.6880 Å <sup>2</sup>   |
| Cavity 4 Volume                  |                        | 27.1872 Å <sup>3</sup>  | 25.6958 Å <sup>3</sup>  |
| Cavity 4 Surface Area            |                        | 53.8397 Å <sup>2</sup>  | 53.2402 Å <sup>2</sup>  |
| Cavity 4 squared gyration radius |                        | 2.3241 Å <sup>2</sup>   | 2.1592 Å <sup>2</sup>   |
| Cavity 5 Volume                  |                        |                         | 91.3246 Å <sup>3</sup>  |
| Cavity 5 Surface Area            |                        |                         | 152.3633 Å <sup>2</sup> |
| Cavity 5 squared gyration radius |                        |                         | 9.9958 Å <sup>2</sup>   |
| Total Volume                     | 59.9 Å <sup>3</sup>    | 185 Å <sup>3</sup>      | 226 Å <sup>3</sup>      |
| Average squared gyration radius  |                        | 4.299 Å <sup>2</sup>    | 4.073 Å <sup>2</sup>    |
|                                  |                        |                         |                         |
|                                  |                        |                         |                         |

**Table S1.** The continuous cavity domains determined by PyModal for a stoichiometric In<sub>2</sub>O<sub>3</sub> 2 × 1 × 1 unit cell, and suboxide unit cells generated by the Supercell program. The grey highlighted rows represent the values for which the averaged cavity volume is determined.
